# Supplementary material for: Efficacy of PD-(L)1 blockade monotherapy compared to PD-(L)1 blockade plus chemotherapy in first-line PD-L1-positive advanced lung adenocarcinomas: A cohort study
Source: bioRxiv or medRxiv preprint supplement (doi:10.1101/2022.12.05.22283131), 2023-02-27

Figure S2

A.

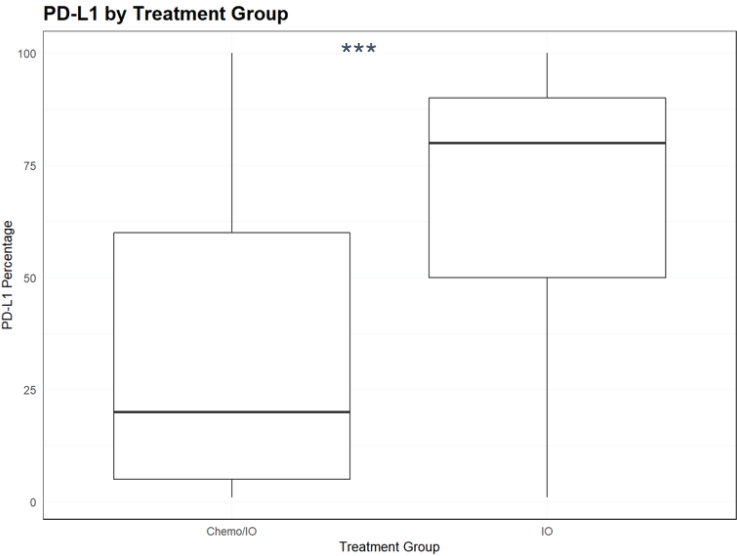

B.

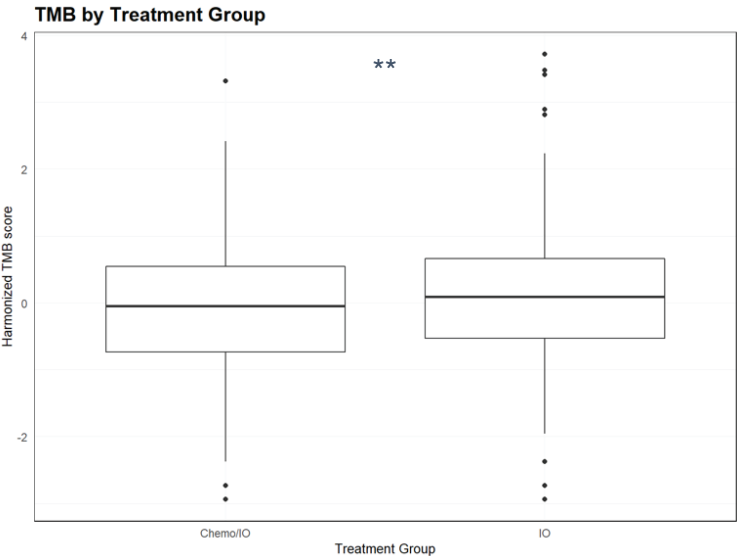

Supplement: Supplementary file [file media-3.pdf]
